# Supplementary material for: Human presence diminishes the importance of climate in driving fire activity across the United States
Source: HighWire-hosted journal article supplement (doi:10.1073/pnas.1713885114), 2017-12-11
Supplement: pnas.201713885SI.pdf [file pnas.201713885SI.pdf]

# Supporting Information

Syphard et al. 10.1073/pnas.1713885114

## SI Text

**Data Sources.** We stratified our analyses of fire-climate relationships using geographical boundaries that delineate relatively homogeneous climatic regions across the United States, created by NEON ([www.neonscience.org/field-sites/spatiotemporal-design](http://www.neonscience.org/field-sites/spatiotemporal-design)).

The federal fire data included historical records from the BLM, NPS, and USFS. These data are available from Wildland Fire Management Information (<https://www.nifc.gov/>) for Department of Interior agencies (NPS and BLM) and from the National Wildfire Coordinating Group ([fam.nwccg.gov/fam-web/weatherfirecd/state\\_data.htm](http://fam.nwccg.gov/fam-web/weatherfirecd/state_data.htm)) for all USFS fires. The national interagency FPA FOD (47) is available at <https://www.fs.usda.gov/rds/archive/Product/RDS-2013-0009.4/> as a point-based Geographic Information System (GIS) layer that also delineates fire origins.

The explanatory variables used to associate with the variation in strength of fire-climate relationships came from a variety of sources. We evaluated two climate variables, mean annual precipitation and mean annual temperature range, using PRISM climate normals ([www.prism.oregonstate.edu/normals/](http://www.prism.oregonstate.edu/normals/)) from 1971 to 2000. To calculate temperature range, we subtracted mean annual minimum temperature from mean annual maximum temperature using PRISM data. We also summarized two topographic variables, slope and elevation, using 30-m data downloaded from LANDFIRE (<https://landfire.cr.usgs.gov/topographic.php>).

To determine whether the importance of climate varied according to resources, or fuel, we evaluated the mean forest biomass (mg/ha) within regions ([https://data.fs.usda.gov/geodata/rastergateway/biomass/conus\\_forest\\_biomass.php](https://data.fs.usda.gov/geodata/rastergateway/biomass/conus_forest_biomass.php)) as well as the proportion of non-Wildland Urban Interface (WUI) vegetated land ([silvis.forest.wisc.edu/maps/wui/2010/download](http://silvis.forest.wisc.edu/maps/wui/2010/download)). We summed the annual proportion area burned across each period of record to determine if the strength of fire-climate relationships varied according to the overall amount of fire in the region.

To investigate the role of human presence in mediating fire-climate relationships, we calculated the mean Euclidean distance to major roads (<https://www.arcgis.com/home/item.html?id=871852b13b53426dabdf875f80c04261>) and the distance to medium- or high-density development (selected from the attributes of the WUI map described above). We used these proximity variables because there is generally little development that occurs within the boundaries of federally owned lands.

**Fire Data Assembly.** We assembled the federal data from individual fire reports, available from years 1972–2010, although some BLM records started in later years, up to 1980. Fire reports vary in form and detail from bureau to bureau, so we assembled commonly input information for all agencies. The coordinate locations represent the point of fire origin, with the area burned for each fire provided in the attribute tables. Therefore, we summed annual area burned within the jurisdictional area of the federal agencies within NEON domains, then divided it by the total area of each region to ensure that the calculation of fire activity was comparable. This resulted in annual values of proportion of area burned for 37 distinct study areas. We calculated jurisdictional area via a spatial overlay of federal land boundaries within boundaries the NEON domains. Because the fires were provided as point locations, it is possible that large fires could span one of the division boundaries. However, we assigned all attributed area burned to the geographical region in which the points were located.

As with the federal data, the FPA FOD data list fire size and year as digital attributes. For analysis of these FPA FOD fires, which encompassed multiple public and private land ownerships, we calculated the proportion of area burned as the annual area burned divided by the entire area within the NEON domain, resulting in 17 study areas. This was the dependent variable in the statistical models of fire-climate relationships.

**Additional Modeling Details.** For hierarchical partitioning analysis, we considered all seasonal temperature and precipitation variables, including prior-year precipitation, for all of the 37 study regions. To meet linear regression assumptions of normal distribution, we log-transformed the response, then specified the model family to be “gaussian” with  $R^2$  as our goodness-of-fit measure.

For the multiple regression analysis, we systematically applied the same approach for all regions. We used the package MuMIn in R (49, 50) to generate multiple-regression models using all possible combinations of the predictor variables and to rank models using Akaike information criterion (sample size corrected). We also calculated the variance inflation factor to check for multicollinearity (51).

Although we present significant results as  $P \leq 0.05$ , if a Bonferroni correction were applied to the  $P$  values to account for multiple comparisons, the significant  $P$  value would be lowered to 0.005.

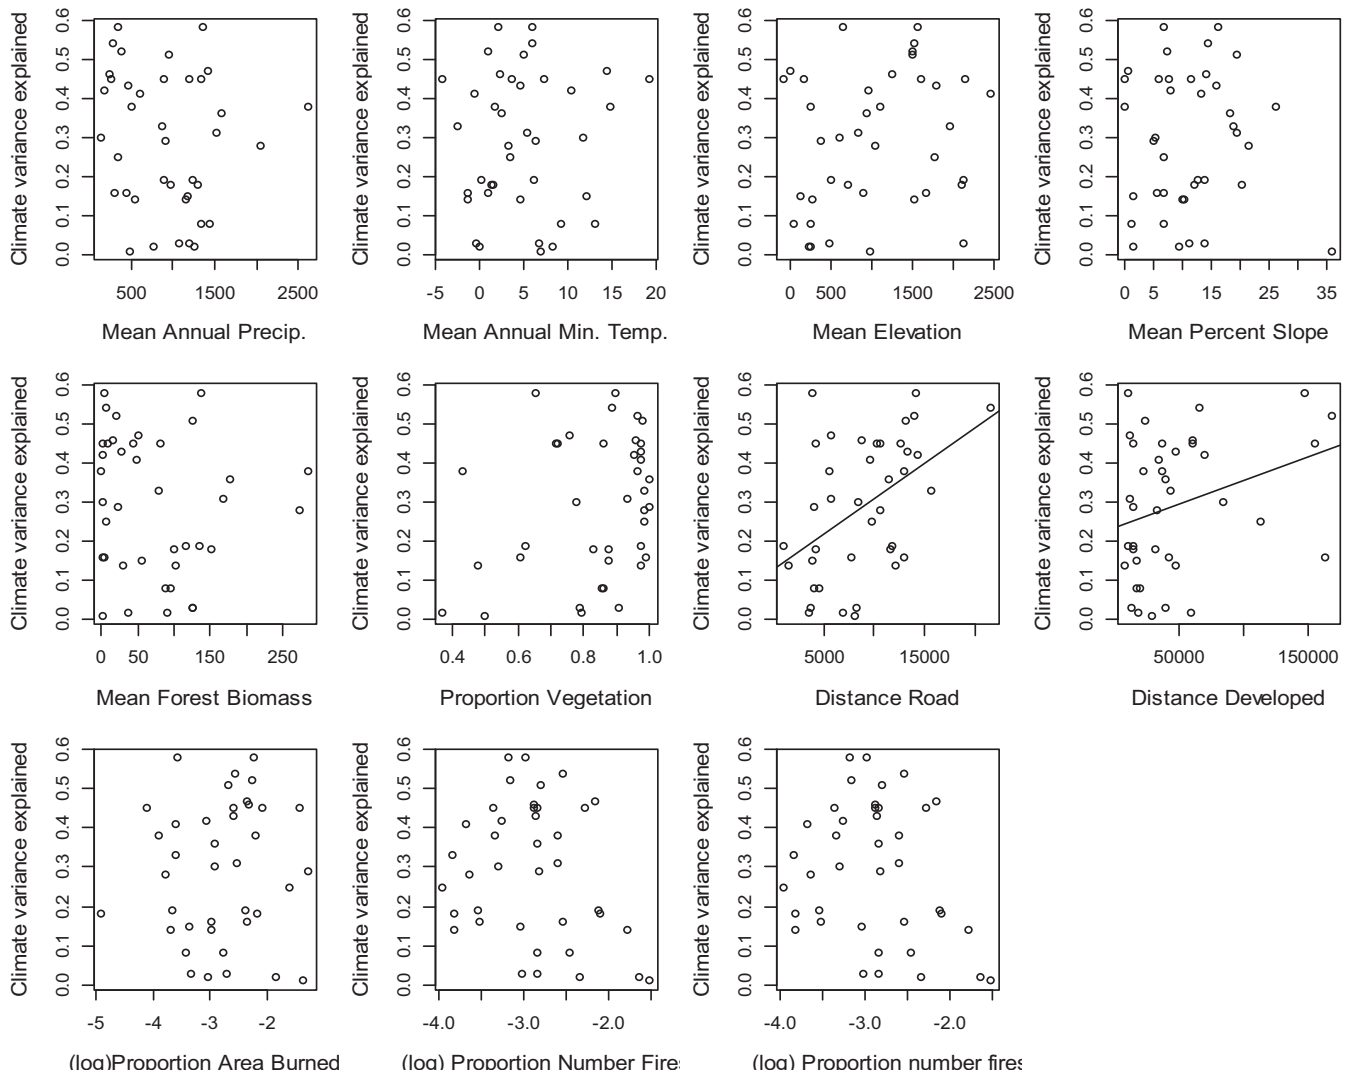

**Fig. S1.** Relationship of variance explained (by climate on fire activity) with biophysical and human characteristics of federal lands in 37 different regions. Trend lines only shown for significant relationships. Min., minimum; Precip., precipitation.

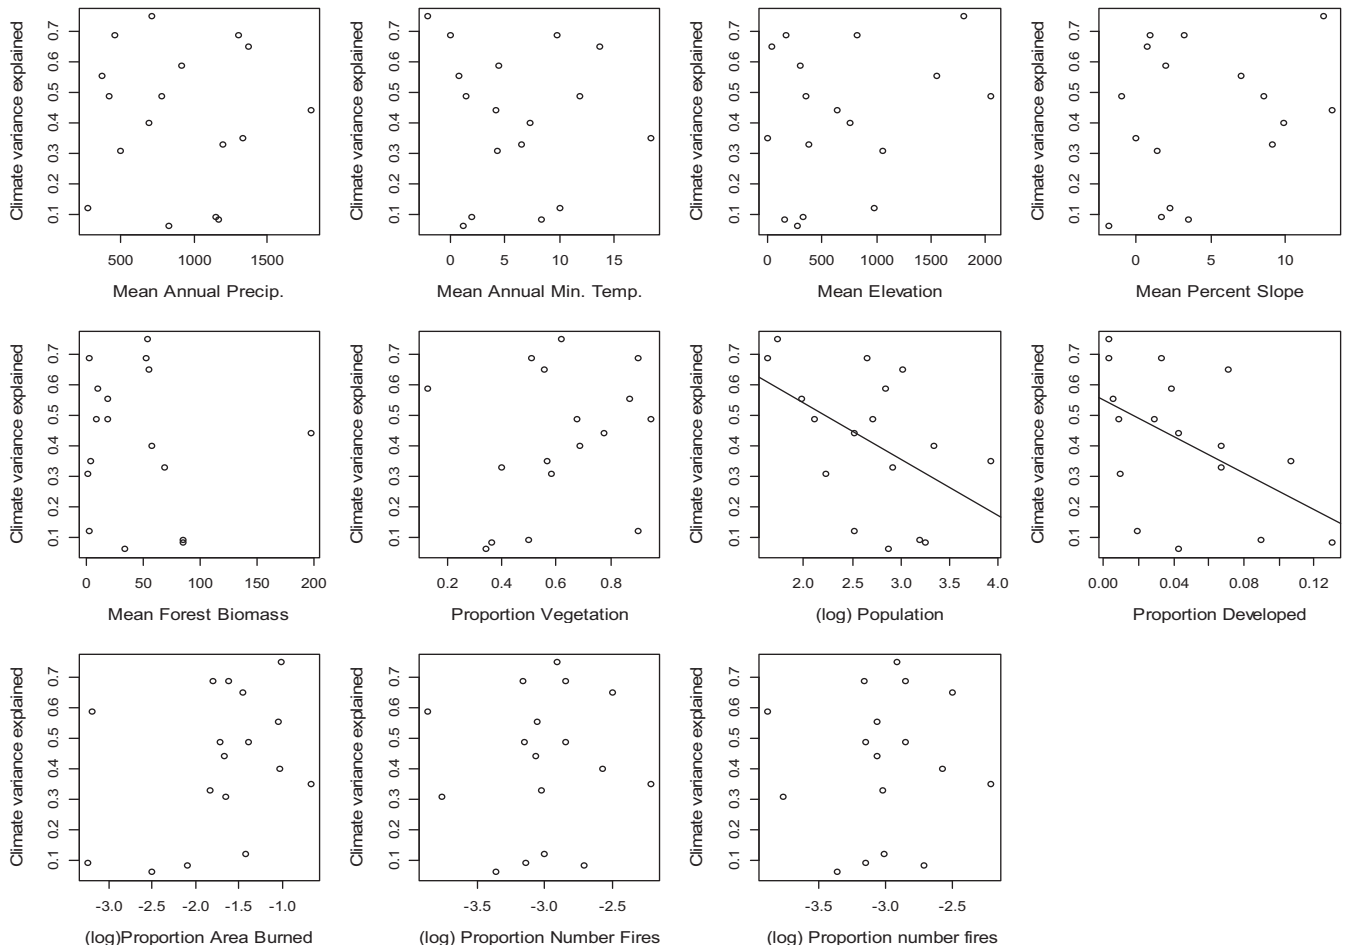

**Fig. S2.** Relationship of variance explained (by climate on fire activity) with biophysical and human characteristics of 17 NEON regions. Trend lines only shown for significant relationships. Min., minimum; Precip., precipitation.

**Table S1. Best-performing multiple-regression model of annual fire activity and seasonal climate variables within NEON domains of three federal agencies**

| NEON domain          | Best model                                             | AIC     | Adjusted $R^2$ | Max VIF |
|----------------------|--------------------------------------------------------|---------|----------------|---------|
| <b>NPS</b>           |                                                        |         |                |         |
| Appalachian          | (neg)Aut_ppt – Spr_ppt – Win_ppt                       | 157.66  | 0.31           | 1.35    |
| Atlantic Neotropical | (neg) Spr_ppt + Sum_tmx + Win_tmx                      | 123.09  | 0.45           | 1       |
| Central Plains       | (neg)Spr_tmx                                           | 185.25  | 0.01           | NA      |
| Desert Southwest     | Prior_ppt – Spr_tmx + Sum_tmx                          | 173.79  | 0.42           | 2       |
| Great Basin          | (neg) Aut_ppt                                          | 152.95  | 0.03           | NA      |
| Great Lakes          | (neg)Prior_ppt                                         | 101.95  | 0.02           | NA      |
| Mid-Atlantic         | (neg)Prior_ppt + Spr_tmx – Win_ppt                     | 159.22  | 0.19           | 1.1     |
| Northeast            | (neg)Sum_ppt                                           | 117.13  | 0.14           | NA      |
| Northern Rockies     | Aut_tmx + Spr_tmx – Sum_ppt                            | 182.69  | 0.45           | 1.1     |
| Northern Plains      | (neg)Spr_ppt – Win_ppt                                 | 129.16  | 0.16           | 1       |
| Ozarks               | Win_tmx                                                | 153     | 0.02           | NA      |
| Pacific Northwest    | Aut_ppt + Sum_tmx + Win_tmx                            | 162.86  | 0.38           | 1.9     |
| Pacific Southwest    | Aut_tmx                                                | 102.98  | 0.18           | NA      |
| Prairie Peninsula    | (neg)Aut_ppt + Spr_tmx                                 | 246.29  | 0.29           | 1.02    |
| Southeast            | (neg)Aut_tmx – Spr_ppt – Spr_tmx – Sum_ppt – Sum_tmx   | 293.68  | 0.47           | 1.6     |
| Southern Plains      | Aut_ppt – Prior_ppt – Spr_ppt – Sum_tmx – Win_tmx      | 381.25  | 0.38           | 2.01    |
| Southern Rockies     | (neg)Prior_ppt – Spr_tmx + Sum_tmx                     | 136.132 | 0.54           | 1.6     |
| <b>USFS</b>          |                                                        |         |                |         |
| Appalachian          | (neg)Aut_ppt – Spr_ppt + Spr_tmx – Win_ppt             | 91.48   | 0.58           | 1.4     |
| Desert Southwest     | Aut_tmx – Spr_ppt – Spr_tmx – Sum_ppt + Win_tmx        | 171.77  | 0.43           | 2.7     |
| Great Basin          | Sum_tmx                                                | 135.65  | 0.19           | NA      |
| Mid-Atlantic         | (neg)Spr_ppt                                           | 136.36  | 0.03           | NA      |
| Northeast            | (neg)Aut_ppt + Sum_ppt + Sum_tmx                       | 131.56  | 0.18           | 1.54    |
| Northern Rockies     | (neg) Prior_ppt + Spr_tmx – Sum_ppt                    | 203.81  | 0.33           | 1.02    |
| Northern Plains      | (neg)Aut_ppt – Sum_ppt                                 | 151.28  | 0.14           | 1       |
| Ozarks               | (neg)Aut_ppt                                           | 149.18  | 0.08           | NA      |
| Pacific Northwest    | Sum_tmx                                                | 163.01  | 0.28           | NA      |
| Pacific Southwest    | (neg)Spr_ppt – Sum_ppt + Sum_tmx                       | 134.68  | 0.51           | 1.19    |
| Prairie Peninsula    | (neg)Aut_ppt + Spr_tmx                                 | 206.1   | 0.45           | 1.23    |
| Southeast            | Win_tmx                                                | 103.83  | 0.08           | NA      |
| Southern Plains      | Prior_ppt + Win_tmx                                    | 156.6   | 0.15           | 1.18    |
| Southern Rockies     | (neg)Prior_ppt – Spr_ppt + Sum_tmx                     | 192.45  | 0.41           | 1.14    |
| <b>BLM</b>           |                                                        |         |                |         |
| Central Plains       | Prior_ppt + Spr_tmx                                    | 402.22  | 0.25           | 1.005   |
| Desert Southwest     | Prior_ppt + Win_ppt + Sum_tmx                          | 95.17   | 0.3            | 1.08    |
| Great Basin          | Prior_ppt + Aut_ppt + Sum_tmx                          | 84.35   | 0.52           | 1.17    |
| Northern Rockies     | (neg)Prior_ppt + Spr_ppt + Spr_tmx + Sum_tmx + Win_tmx | 159.67  | 0.58           | 2.23    |
| Northern Plains      | Sum_tmx                                                | 122.51  | 0.16           | NA      |
| Pacific Northwest    | Aut_tmx + Sum_tmx                                      | 125.52  | 0.36           | 1.12    |
| Pacific Southwest    | Aut_tmx + Prior_ppt + Sum_tmx + win_tmx                | 96.78   | 0.46           | 1.89    |
| Southern Rockies     | Spr_tmx + Win_ppt + Win_tmx                            | 94.83   | 0.45           | 1.13    |

AIC, Akaike information criterion; Aut, autumn; Max VIF, maximum variance inflation; NA, not applicable; ppt, mean precipitation; Spr, spring; Sum, summer; tmx, mean maximum temperature; Win, winter.
